# Supplementary material
Source: PubMed Central journal article supplement (PMC7964952)
Supplement: 2242_tables.pdf [file 2242_tables.pdf]

**On-line Table 1: Demographic and clinical characteristics of 19 patients with primary CD**

| No. | Sex | Age (yr) | Symptom Duration (yr) | Tsui Score (Baseline) | Tsui Score (Follow-up) | Time between MRI Studies (mo) |
|-----|-----|----------|-----------------------|-----------------------|------------------------|-------------------------------|
| 1   | F   | 72       | 8                     | 10                    | 18                     | 58                            |
| 2   | F   | 41       | 18                    | 16                    | 15                     | 58                            |
| 3   | F   | 43       | 9                     | 6                     | 9                      | 58                            |
| 4   | F   | 38       | 24                    | 9                     | 9                      | 60                            |
| 5   | M   | 38       | 9                     | 10                    | 12                     | 69                            |
| 6   | F   | 37       | 25                    | 6                     | 5                      | 64                            |
| 7   | F   | 52       | 7                     | 8                     | NA                     | NA                            |
| 8   | F   | 58       | 13                    | 12                    | 10                     | 61                            |
| 9   | F   | 49       | 3                     | 12                    | NA                     | NA                            |
| 10  | M   | 69       | 10                    | 9                     | 8                      | 68                            |
| 11  | F   | 45       | 8                     | 15                    | 13                     | 59                            |
| 12  | F   | 55       | 5                     | 11                    | NA                     | NA                            |
| 13  | M   | 54       | 21                    | 8                     | NA                     | NA                            |
| 14  | F   | 53       | 21                    | 8                     | NA                     | NA                            |
| 15  | M   | 61       | 14                    | 13                    | 7                      | 70                            |
| 16  | F   | 49       | 9                     | 7                     | 7                      | 65                            |
| 17  | F   | 68       | 17                    | 6                     | NA                     | NA                            |
| 18  | F   | 60       | 8                     | 13                    | NA                     | NA                            |
| 19  | F   | 68       | 13                    | 13                    | 10                     | 69                            |

**On-line Table 2: Brain regions showing significantly lower GM volume in 19 patients with CD with respect to 28 healthy controls**

| Brain Region            | Brodmann Areas | Cluster Level   |      | Voxel Level |         | MNI Coordinates   |
|-------------------------|----------------|-----------------|------|-------------|---------|-------------------|
|                         |                | $P_{corrected}$ | k    | FDR         | z Score |                   |
| L caudate head          | —              | .006            | 1383 | 0.01        | 3.93    | <b>-12 6 12</b>   |
| L putamen               | —              |                 |      | 0.01        | 3.62    | -24 12 -6         |
| L primary sensory motor | 1, 2, 3, 4     | .05             | 555  | 0.01        | 3.70    | <b>-60 -14 20</b> |
| L premotor              | 6              |                 |      | 0.01        | 3.52    | -48 -6 34         |
| R primary sensory motor | 1, 2, 3, 4     | .05             | 495  | 0.01        | 3.63    | <b>62 -8 26</b>   |
| R premotor              | 6              | .05             | 489  | 0.01        | 3.57    | <b>46 -2 40</b>   |
| R primary sensory motor | 1, 2, 3, 4     |                 |      | 0.01        | 3.54    | 24 -6 48          |
| R premotor              | 6              |                 |      | 0.01        | 3.47    | 44 2 54           |

**Note:**—Bold-type numbers indicate large clusters; regular-type numbers indicate sub-clusters (peaks at least 8 mm apart)
